# Supplementary material for: Reaction of Oat Genotypes to Fusarium equiseti (Corda) Sacc. Infection and Mycotoxin Concentrations in Grain
Source: MDPI journal article supplement (doi:10.3390/agronomy12020295), 2022-01-24
Supplement: s1 [file s1]

# Supplementary Materials

**Table S1.** Effect of inoculation of oat panicles with *F. equiseti* No O-020 on the number of kernels per panicle<sup>1</sup>, kernels yield per 10 panicles and 1000 kernels weight, average in 2015.

| Genotypes       | Elements of the yield structure |                     |                    |                    |                         |                    |
|-----------------|---------------------------------|---------------------|--------------------|--------------------|-------------------------|--------------------|
|                 | Number of kernels               |                     | Kernels yield (g)  |                    | 1000 kernels weight (g) |                    |
|                 | <i>F. eq.</i>                   | control             | <i>F. eq.</i>      | control            | <i>F. eq.</i>           | control            |
| Agent           | 51.70 <sup>a</sup>              | 65.12 <sup>b</sup>  | 18.48 <sup>a</sup> | 25.11 <sup>b</sup> | 36.09 <sup>a</sup>      | 39.81 <sup>a</sup> |
| Elegant         | 86.55 <sup>a</sup>              | 90.00 <sup>a</sup>  | 24.16 <sup>a</sup> | 32.31 <sup>b</sup> | 23.91 <sup>a</sup>      | 35.87 <sup>b</sup> |
| Denar           | 59.00 <sup>a</sup>              | 69.97 <sup>b</sup>  | 18.68 <sup>a</sup> | 29.47 <sup>b</sup> | 31.48 <sup>a</sup>      | 42.19 <sup>b</sup> |
| Kozak           | 67.47 <sup>a</sup>              | 79.92 <sup>b</sup>  | 20.52 <sup>a</sup> | 30.58 <sup>b</sup> | 29.96 <sup>a</sup>      | 38.56 <sup>b</sup> |
| Romulus         | 74.90 <sup>a</sup>              | 86.35 <sup>b</sup>  | 23.64 <sup>a</sup> | 34.43 <sup>b</sup> | 29.25 <sup>a</sup>      | 39.88 <sup>b</sup> |
| DC06011-8       | 74.60 <sup>a</sup>              | 108.77 <sup>b</sup> | 20.22 <sup>a</sup> | 39.24 <sup>b</sup> | 27.60 <sup>a</sup>      | 36.00 <sup>b</sup> |
| DC 14-8         | 57.77 <sup>a</sup>              | 80.42 <sup>b</sup>  | 16.51 <sup>a</sup> | 27.74 <sup>b</sup> | 32.62 <sup>a</sup>      | 34.61 <sup>a</sup> |
| POB 4109/10     | 57.12 <sup>a</sup>              | 84.75 <sup>b</sup>  | 16.98 <sup>a</sup> | 30.75 <sup>b</sup> | 29.69 <sup>a</sup>      | 38.81 <sup>b</sup> |
| POB 6020/10     | 87.90 <sup>a</sup>              | 93.50 <sup>a</sup>  | 27.49 <sup>a</sup> | 33.03 <sup>b</sup> | 30.34 <sup>a</sup>      | 35.37 <sup>b</sup> |
| POB 961-1344/13 | 74.47 <sup>a</sup>              | 86.52 <sup>b</sup>  | 20.05 <sup>a</sup> | 33.31 <sup>b</sup> | 27.07 <sup>a</sup>      | 38.50 <sup>b</sup> |
| Average         | 69.15 <sup>a</sup>              | 84.53 <sup>b</sup>  | 52.96 <sup>a</sup> | 76.55 <sup>b</sup> | 27.07 <sup>a</sup>      | 76.55 <sup>b</sup> |

<sup>1</sup> Number of kernels per panicle were analyzed in 40 panicles (4 × 10). The average values marked with the same letter, do not differ significantly, at P ≤ 0.05.

**Table S2.** Effect of inoculation of oat panicles with *F. equiseti* No O-020 on the number of kernels per panicle<sup>1</sup>, kernels yield per 10 panicles and 1000 kernels weight, average in 2016.

| Genotypes       | Elements of the yield structure |                    |                    |                    |                         |                    |
|-----------------|---------------------------------|--------------------|--------------------|--------------------|-------------------------|--------------------|
|                 | Number of kernels               |                    | Kernels yield (g)  |                    | 1000 kernels weight (g) |                    |
|                 | <i>F. eq.</i>                   | control            | <i>F. eq.</i>      | control            | <i>F. eq.</i>           | control            |
| Agent           | 28.22 <sup>a</sup>              | 80.37 <sup>b</sup> | 10.68 <sup>a</sup> | 31.16 <sup>b</sup> | 37.74 <sup>a</sup>      | 40.15 <sup>a</sup> |
| Elegant         | 33.25 <sup>a</sup>              | 52.52 <sup>b</sup> | 10.52 <sup>a</sup> | 17.66 <sup>b</sup> | 31.45 <sup>a</sup>      | 33.62 <sup>b</sup> |
| Denar           | 31.15 <sup>a</sup>              | 77.70 <sup>b</sup> | 9.40 <sup>a</sup>  | 21.42 <sup>b</sup> | 30.29 <sup>a</sup>      | 32.91 <sup>a</sup> |
| Kozak           | 35.57 <sup>a</sup>              | 76.87 <sup>b</sup> | 12.40 <sup>a</sup> | 26.57 <sup>b</sup> | 34.89 <sup>a</sup>      | 38.19 <sup>b</sup> |
| Romulus         | 55.75 <sup>a</sup>              | 58.62 <sup>a</sup> | 13.65 <sup>a</sup> | 20.62 <sup>b</sup> | 24.10 <sup>a</sup>      | 36.85 <sup>b</sup> |
| DC06011-8       | 35.15 <sup>a</sup>              | 65.00 <sup>b</sup> | 12.88 <sup>a</sup> | 20.38 <sup>b</sup> | 36.56 <sup>a</sup>      | 38.49 <sup>b</sup> |
| DC 14-8         | 50.20 <sup>a</sup>              | 64.15 <sup>b</sup> | 13.39 <sup>a</sup> | 20.56 <sup>b</sup> | 26.76 <sup>a</sup>      | 33.80 <sup>b</sup> |
| POB 4109/10     | 19.82 <sup>a</sup>              | 58.17 <sup>b</sup> | 7.03 <sup>a</sup>  | 19.88 <sup>b</sup> | 35.50 <sup>a</sup>      | 36.73 <sup>a</sup> |
| POB 6020/10     | 41.85 <sup>a</sup>              | 82.25 <sup>b</sup> | 13.07 <sup>a</sup> | 26.70 <sup>b</sup> | 31.20 <sup>a</sup>      | 33.34 <sup>b</sup> |
| POB 961-1344/13 | 36.82 <sup>a</sup>              | 62.35 <sup>b</sup> | 12.56 <sup>a</sup> | 21.25 <sup>b</sup> | 34.15 <sup>a</sup>      | 36.10 <sup>a</sup> |
| Average         | 36.78 <sup>a</sup>              | 67.80 <sup>b</sup> | 11.56 <sup>a</sup> | 22.62 <sup>b</sup> | 32.26 <sup>a</sup>      | 36.02 <sup>b</sup> |

<sup>1</sup> Number of kernels per panicle were analyzed in 40 panicles (4 × 10). The average values marked with the same letter, do not differ significantly, at P ≤ 0.05.

**Table S3.** Effect of inoculation of oat panicles with *F. equiseti* No O-020 on the number of kernels per panicle<sup>1</sup>, kernels yield per 10 panicles and 1000 kernels weight, average in 2017.

| Genotypes       | Elements of the yield structure |                     |                    |                    |                        |                    |
|-----------------|---------------------------------|---------------------|--------------------|--------------------|------------------------|--------------------|
|                 | Number of kernels               |                     | Kernels yield (g)  |                    | 1000 kernel weight (g) |                    |
|                 | <i>F. eq.</i>                   | control             | <i>F. eq.</i>      | control            | <i>F. eq.</i>          | control            |
| Agent           | 66.20 <sup>a</sup>              | 69.20 <sup>a</sup>  | 25.77 <sup>a</sup> | 27.41 <sup>a</sup> | 38.88 <sup>a</sup>     | 39.63 <sup>a</sup> |
| Elegant         | 64.52 <sup>a</sup>              | 64.85 <sup>a</sup>  | 23.58 <sup>a</sup> | 25.45 <sup>a</sup> | 36.60 <sup>a</sup>     | 39.29 <sup>b</sup> |
| Denar           | 46.00 <sup>a</sup>              | 70.25 <sup>b</sup>  | 14.30 <sup>a</sup> | 22.18 <sup>b</sup> | 30.75 <sup>a</sup>     | 31.69 <sup>a</sup> |
| Kozak           | 62.22 <sup>a</sup>              | 82.05 <sup>b</sup>  | 21.72 <sup>a</sup> | 30.97 <sup>b</sup> | 34.93 <sup>a</sup>     | 37.74 <sup>a</sup> |
| Romulus         | 55.15 <sup>a</sup>              | 79.25 <sup>b</sup>  | 20.76 <sup>a</sup> | 30.07 <sup>b</sup> | 37.62 <sup>a</sup>     | 37.98 <sup>a</sup> |
| DC06011-8       | 66.05 <sup>a</sup>              | 100.30 <sup>b</sup> | 22.50 <sup>a</sup> | 36.69 <sup>b</sup> | 34.02 <sup>a</sup>     | 36.54 <sup>b</sup> |
| DC 14-8         | 54.62 <sup>a</sup>              | 75.90 <sup>b</sup>  | 17.87 <sup>a</sup> | 25.45 <sup>b</sup> | 32.50 <sup>a</sup>     | 33.56 <sup>a</sup> |
| POB 4109/10     | 28.30 <sup>a</sup>              | 65.40 <sup>b</sup>  | 8.61 <sup>a</sup>  | 23.67 <sup>b</sup> | 27.88 <sup>a</sup>     | 36.20 <sup>b</sup> |
| POB 6020/10     | 50.70 <sup>a</sup>              | 73.40 <sup>b</sup>  | 15.58 <sup>a</sup> | 21.52 <sup>b</sup> | 28.98 <sup>a</sup>     | 31.52 <sup>b</sup> |
| POB 961-1344/13 | 35.30 <sup>a</sup>              | 92.42 <sup>b</sup>  | 14.45 <sup>a</sup> | 29.24 <sup>b</sup> | 27.21 <sup>a</sup>     | 34.62 <sup>b</sup> |
| Average         | 52.91 <sup>a</sup>              | 77.30 <sup>b</sup>  | 18.51 <sup>a</sup> | 27.26 <sup>b</sup> | 32.94 <sup>a</sup>     | 35.88 <sup>b</sup> |

<sup>1</sup> Number of kernels per panicle were analyzed in 40 panicles (4 × 10). The average values marked with the same letter, do not differ significantly, at P ≤ 0.05.
